# Supplementary material
Source: PubMed Central journal article supplement (PMC2899902)
Supplement: pp.110.156018_1.pdf [file pp.110.156018_1.pdf]

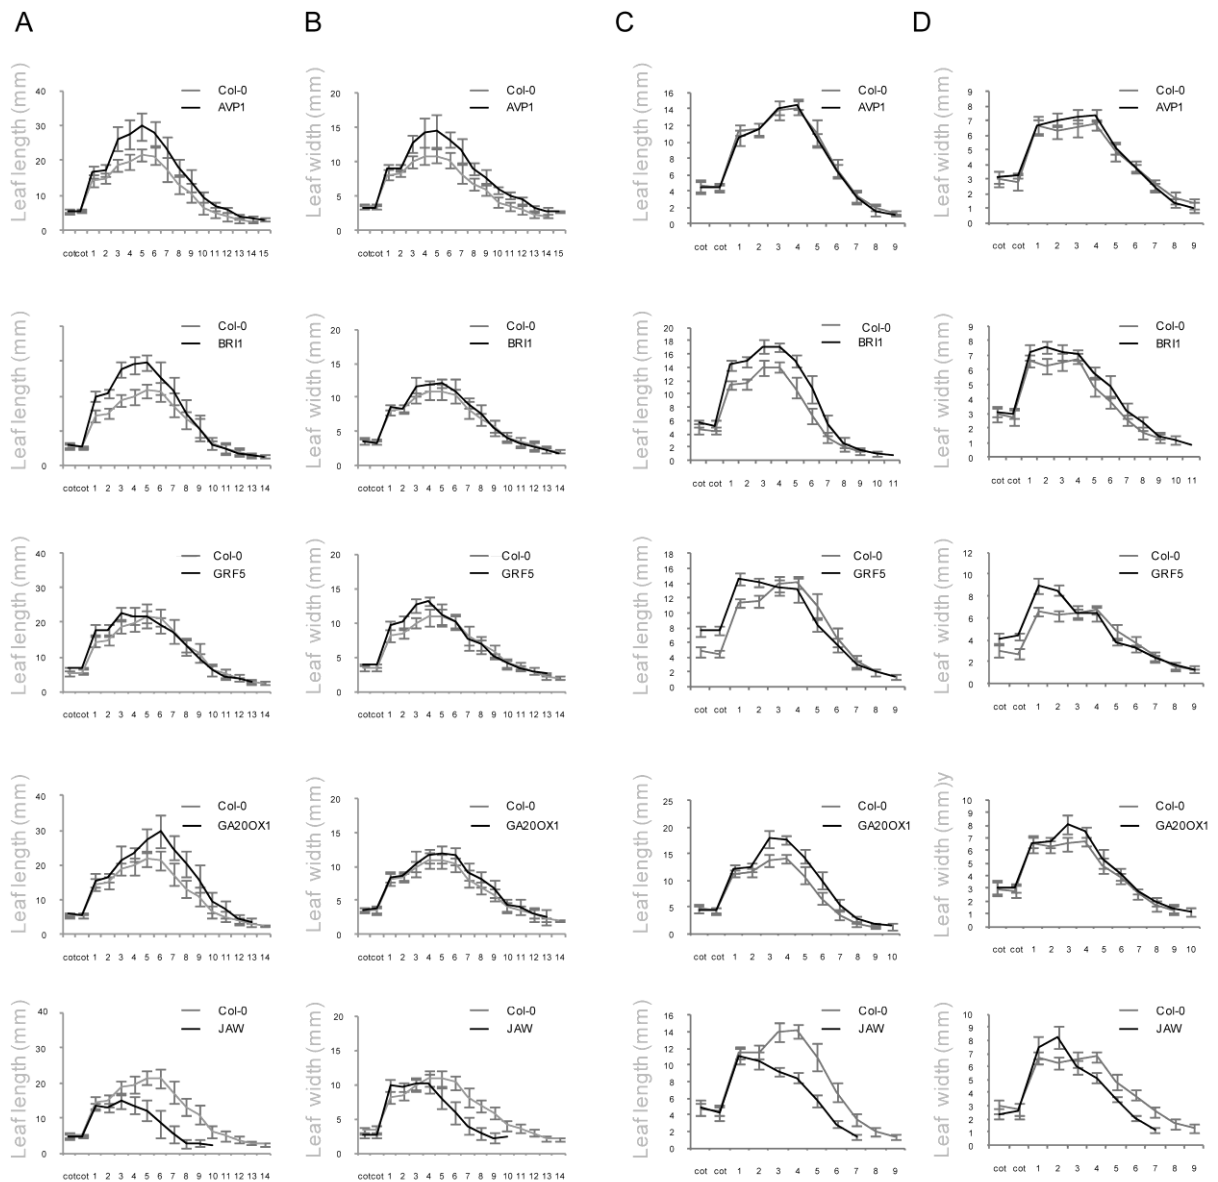

**Supplemental Figure S1.** Rosette leaf length and width of Col-0 and the five IYG lines.

Plants were grown in semi-hydroponic conditions (A and B) or in vitro (C and D) and harvested to make leaf series after 22 DAS. A and C, individual length of rosette leaves. B and D, individual width of rosette leaves. Averages  $\pm$  SD (n =8-12).

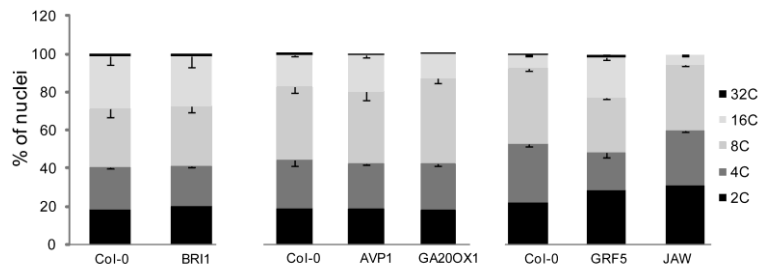

**Supplemental Figure S2.** Ploidy level in Col-0 and the five IYG lines.

Plants were grown in vitro (GRF5 and JAW) or in soil (AVP1, BRI1 and GA20OX1) and leaves 1 and 2 (BRI1, GRF5 and JAW) or leaves 6 (AVP1 and GA20OX) were harvested for flow cytometry analysis. The percentages of nuclei containing 2C, 4C, 8C, 16C and 32C of DNA are shown. Averages  $\pm$  SD (n =5; \*: p<0.05).

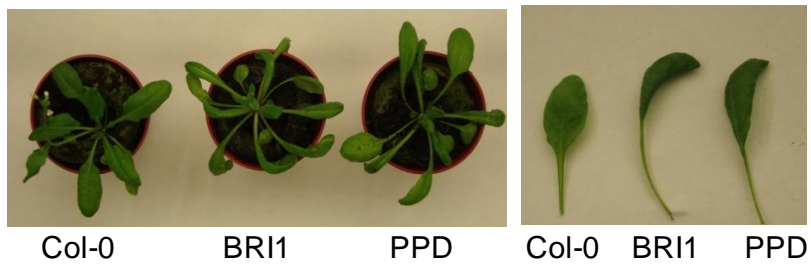

**Supplemental Figure S3.** Rosette phenotype of BRI1 and PPD lines.

Plants were grown for 28 days in soil. Pictures of an individual leaf of Col-0, BRI1, and PPD plants.

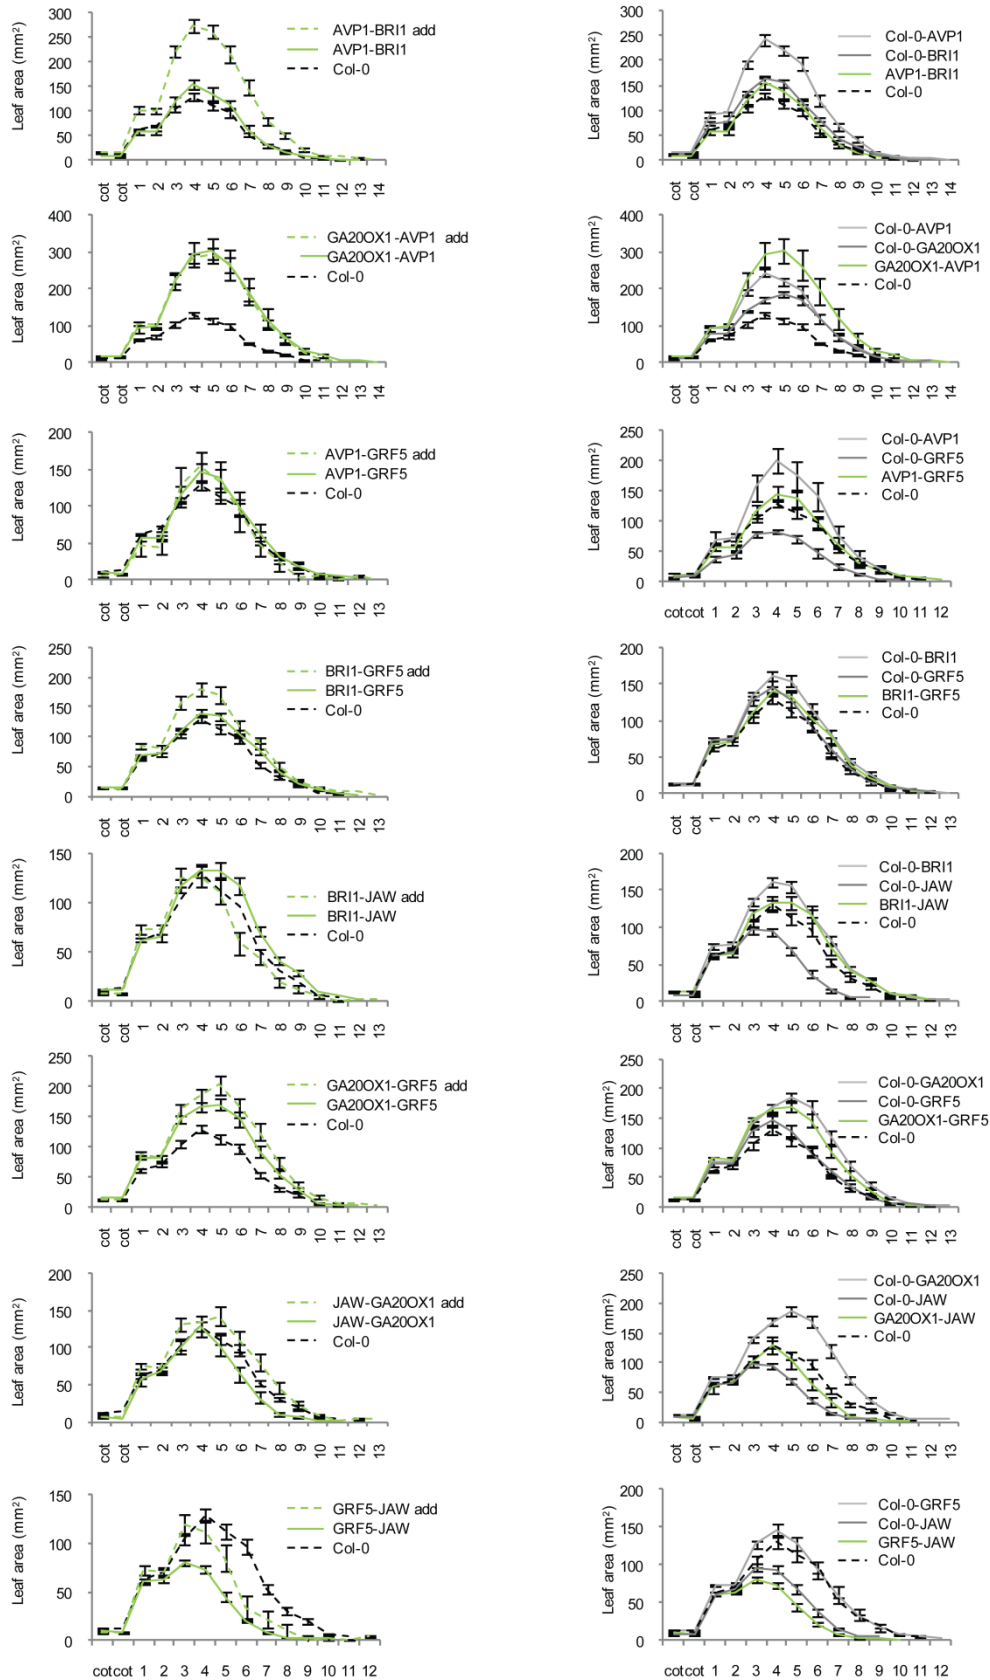

**Supplemental Figure S4.** Effect of combined pairs of two IYGs on leaf area.

Leaf series were harvested from 22-day-old plants grown in soil and the area of individual leaves was measured. Values are averages  $\pm$  SE (n = 10-14).
