# Supplementary material
Source: PubMed Central journal article supplement (PMC2899902)
Supplement: pp.110.156018_2.pdf [file pp.110.156018_2.pdf]

**Supplemental Table S4.**

Differences in metabolite content between MD and ED in Col-0 and the five IYG lines. Plants were grown in vitro until stage 1.03 and the vegetative part of the seedlings were harvested at the middle (MD) and at the end (ED) of the day.

The Table represents the percentage of difference between these two time points. graded color scale: %<100 : red, %>100 : blue

|                           | Col-0 | AVP1 | GA20OX1 | BRI1 | JAW | GRF5 |
|---------------------------|-------|------|---------|------|-----|------|
| chl a                     | 89    | 105  | 98      | 120  | 89  | 112  |
| chl b                     | 134   | 107  | 95      | 94   | 93  | 101  |
| proteins                  | 96    | 100  | 97      | 91   | 96  | 95   |
| sucrose                   | 117   | 124  | 115     | 122  | 115 | 141  |
| glucose                   | 81    | 95   | 87      | 88   | 69  | 80   |
| fructose                  | 83    | 86   | 75      | 86   | 77  | 82   |
| starch                    | 174   | 150  | 164     | 155  | 132 | 171  |
| Trehalose                 | 90    | 97   | 95      | 109  | 98  | 117  |
| Raffinose                 | 98    | 75   | 101     | 100  | 122 | 100  |
| Galactinol                | 60    | 62   | 71      | 52   | 103 | 45   |
| Inositol, myo             | 101   | 98   | 102     | 98   | 97  | 100  |
| Maltotriose               | 78    | 95   | 71      | 104  | 127 | 106  |
| Melezitose                | 94    | 100  | 57      | 117  | 126 | 145  |
| Gentiobiose               | 91    | 97   | 98      | 100  | 107 | 135  |
| Erythritol                | 110   | 107  | 98      | 104  | 98  | 120  |
| Xylitol                   | 101   | 110  | 98      | 110  | 96  | 117  |
| T6P                       | 214   | 201  | 185     | 177  | 168 | 204  |
| ADPG                      | 111   | 94   | 105     | 86   | 106 | 110  |
| S6P                       | 134   | 92   | 123     | 101  | 119 | 111  |
| G1P                       | 98    | 87   | 96      | 101  | 96  | 97   |
| UDPG                      | 121   | 103  | 110     | 109  | 112 | 111  |
| G6P                       | 106   | 84   | 95      | 82   | 98  | 99   |
| F6P                       | 134   | 84   | 98      | 92   | 96  | 99   |
| FBP                       | 94    | 68   | 110     | 92   | 90  | 91   |
| Inositol-1-phosphate, myo | 88    | 98   | 62      | 52   | 76  | 118  |
| Gly3P                     | 97    | 89   | 103     | 99   | 102 | 92   |
| 6-PG                      | 114   | 87   | 137     | 72   | 90  | 81   |
| PEP                       | 101   | 115  | 96      | 83   | 100 | 104  |
| PGA                       | 129   | 109  | 101     | 95   | 111 | 138  |
| pyruvate                  | 125   | 95   | 113     | 110  | 102 | 125  |
| citrate                   | 90    | 72   | 89      | 65   | 91  | 84   |
| aconitate                 | 82    | 67   | 73      | 57   | 91  | 89   |
| 2-OG                      | 149   | 91   | 138     | 91   | 127 | 142  |
| succinate                 | 138   | 51   | 124     | 65   | 125 | 110  |
| malate                    | 93    | 101  | 87      | 87   | 95  | 109  |
| fumarate                  | 108   | 112  | 99      | 92   | 97  | 116  |
| glycerate                 | 107   | 87   | 108     | 86   | 97  | 105  |
| AA                        | 93    | 99   | 95      | 92   | 85  | 101  |
| Glutamine                 | 62    | 143  | 61      | 86   | 125 | 114  |
| Glutamic acid             | 111   | 103  | 110     | 103  | 103 | 101  |
| Aspartic acid             | 92    | 80   | 84      | 89   | 92  | 105  |
| Alanine                   | 58    | 113  | 33      | 88   | 138 | 173  |
| Asparagine                | 116   | 80   | 128     | 98   | 62  | 63   |

|                             |     |     |     |     |     |     |
|-----------------------------|-----|-----|-----|-----|-----|-----|
| Glycine                     | 86  | 101 | 87  | 70  | 75  | 79  |
| Serine                      | 102 | 105 | 107 | 95  | 105 | 97  |
| Arginine                    | 111 | 102 | 94  | 90  | 110 | 119 |
| Proline                     | 119 | 125 | 138 | 132 | 98  | 126 |
| Methionine                  | 73  | 81  | 69  | 84  | 73  | 84  |
| Threonine                   | 117 | 106 | 108 | 103 | 113 | 129 |
| shikimate                   | 134 | 95  | 118 | 90  | 103 | 118 |
| Phenylalanine               | 250 | 217 | 214 | 221 | 230 | 271 |
| Tryptophan                  | 140 | 172 | 109 | 132 | 151 | 215 |
| Tyrosine                    | 146 | 174 | 125 | 132 | 131 | 172 |
| Ornithine                   | 79  | 86  | 83  | 55  | 91  | 65  |
| Putrescine                  | 91  | 88  | 92  | 95  | 81  | 104 |
| Tocopherol                  | 73  | 98  | 76  | 96  | 123 | 118 |
| Butyric acid                | 89  | 106 | 97  | 98  | 88  | 97  |
| Galactonic acid-1,4-lactone | 96  | 100 | 98  | 104 | 88  | 111 |
| Galactonic acid             | 90  | 91  | 94  | 97  | 94  | 103 |
| Hexadecenoic acid           | 106 | 97  | 104 | 90  | 113 | 114 |
| Nicotinic acid              | 103 | 78  | 100 | 102 | 118 | 114 |
| Octadecanoic acid           | 105 | 102 | 107 | 87  | 108 | 115 |
| Ascorbic acid               | 69  | 239 | 79  | 161 | 94  | 89  |
| Dehydroascorbic acid dimer  | 95  | 87  | 102 | 93  | 91  | 111 |
